# Supplementary material for: Life-Long Neurogenic Activity of Individual Neural Stem Cells and Continuous Growth Establish an Outside-In Architecture in the Teleost Pallium
Source: PubMed Central journal article supplement — Curr Biol. 2017 Nov 6;27(21):3288–3301.e3. doi: 10.1016/j.cub.2017.09.052 (PMC5678050; doi:10.1016/j.cub.2017.09.052), 2017-11-06
Supplement: mmc1.pdf [file mmc1.pdf]

**Current Biology, Volume 27**

**Supplemental Information**

**Life-Long Neurogenic Activity of Individual  
Neural Stem Cells and Continuous Growth Establish  
an Outside-In Architecture in the Teleost Pallium**

**Giacomo Furlan, Valentina Cuccioli, Nelly Vuillemin, Lara Dirian, Anna Janue Muntasell, Marion Coolen, Nicolas Dray, Sébastien Bedu, Corinne Houart, Emmanuel Beaurepaire, Isabelle Foucher, and Laure Bally-Cuif**

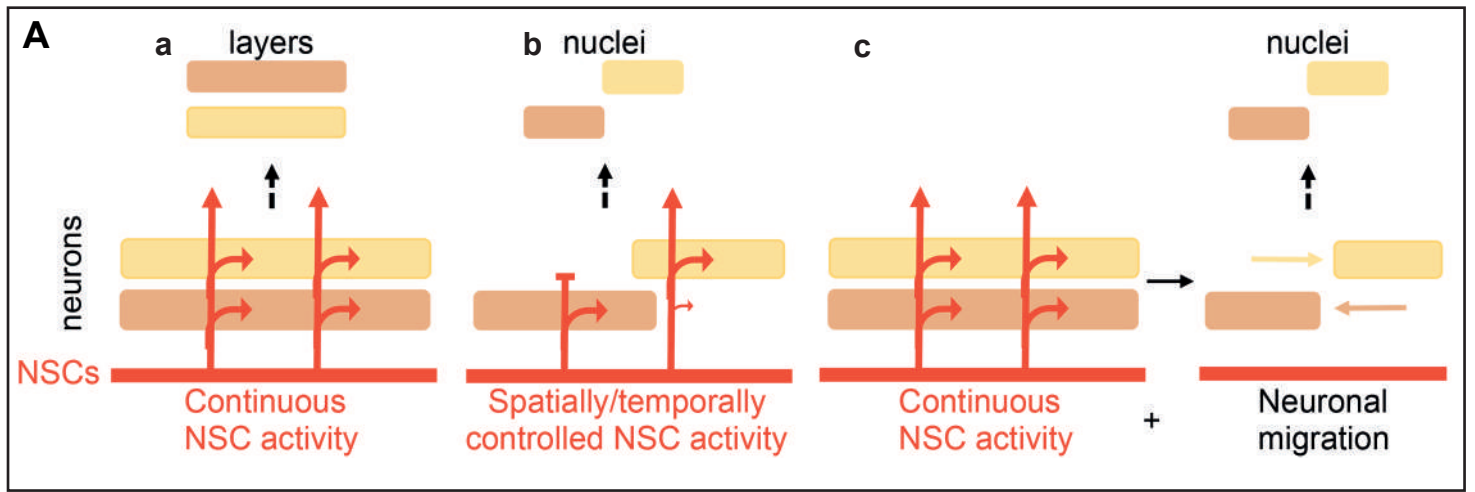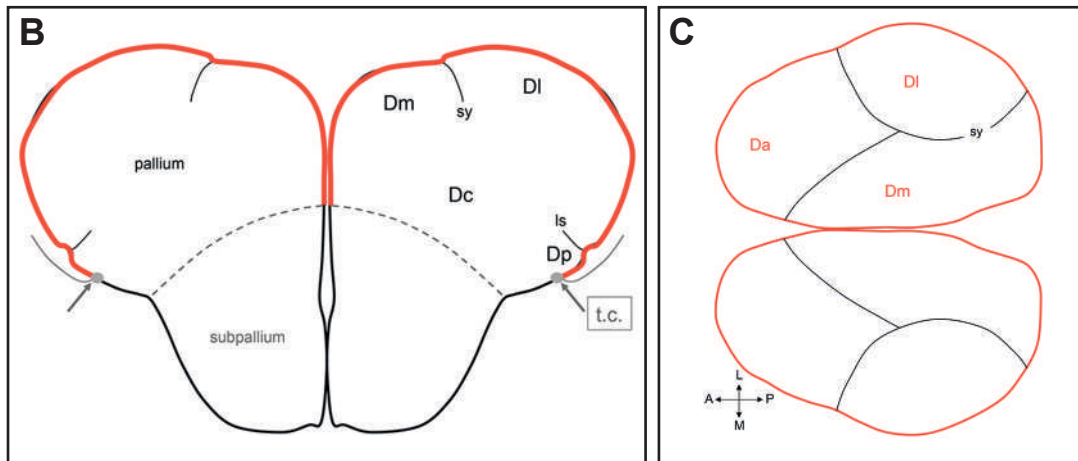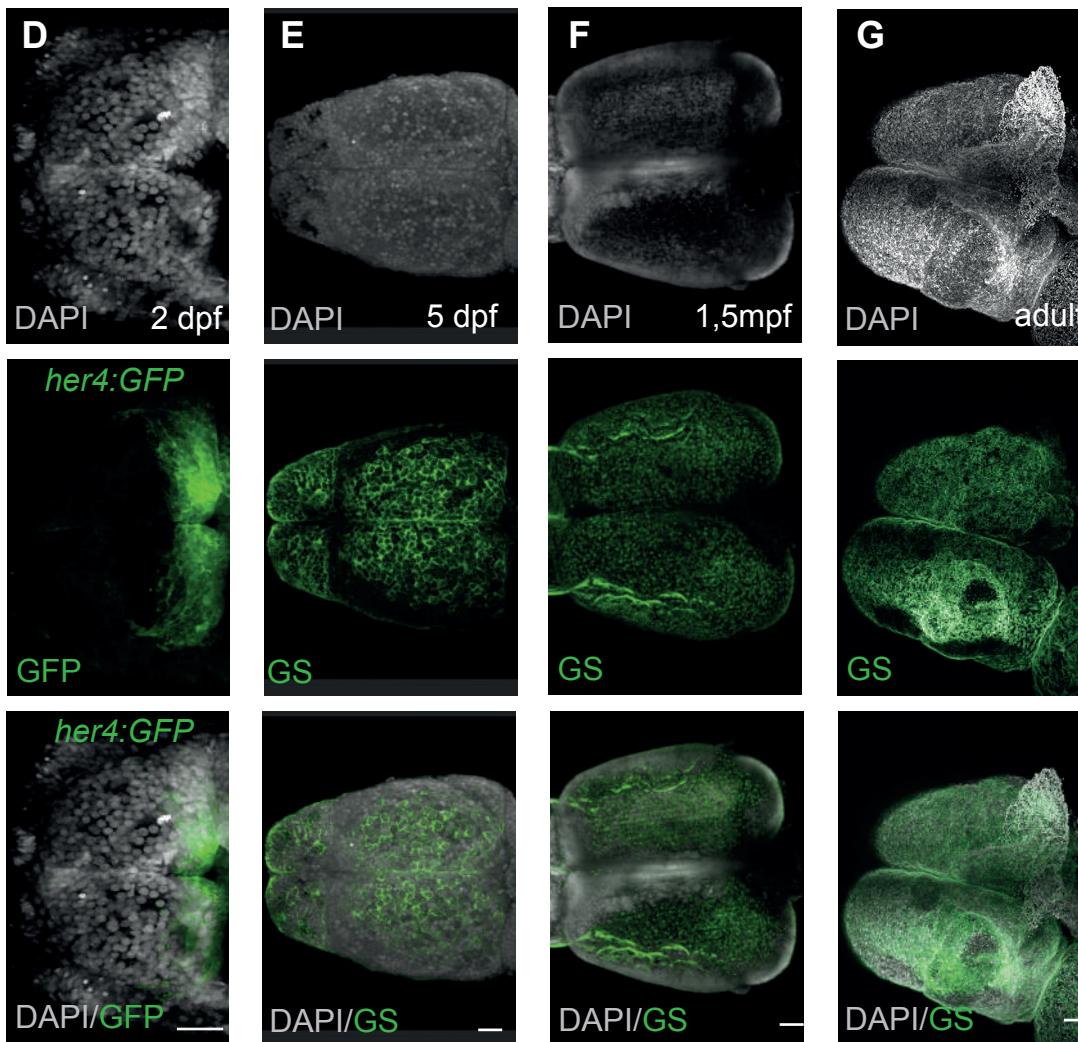

Figure S1

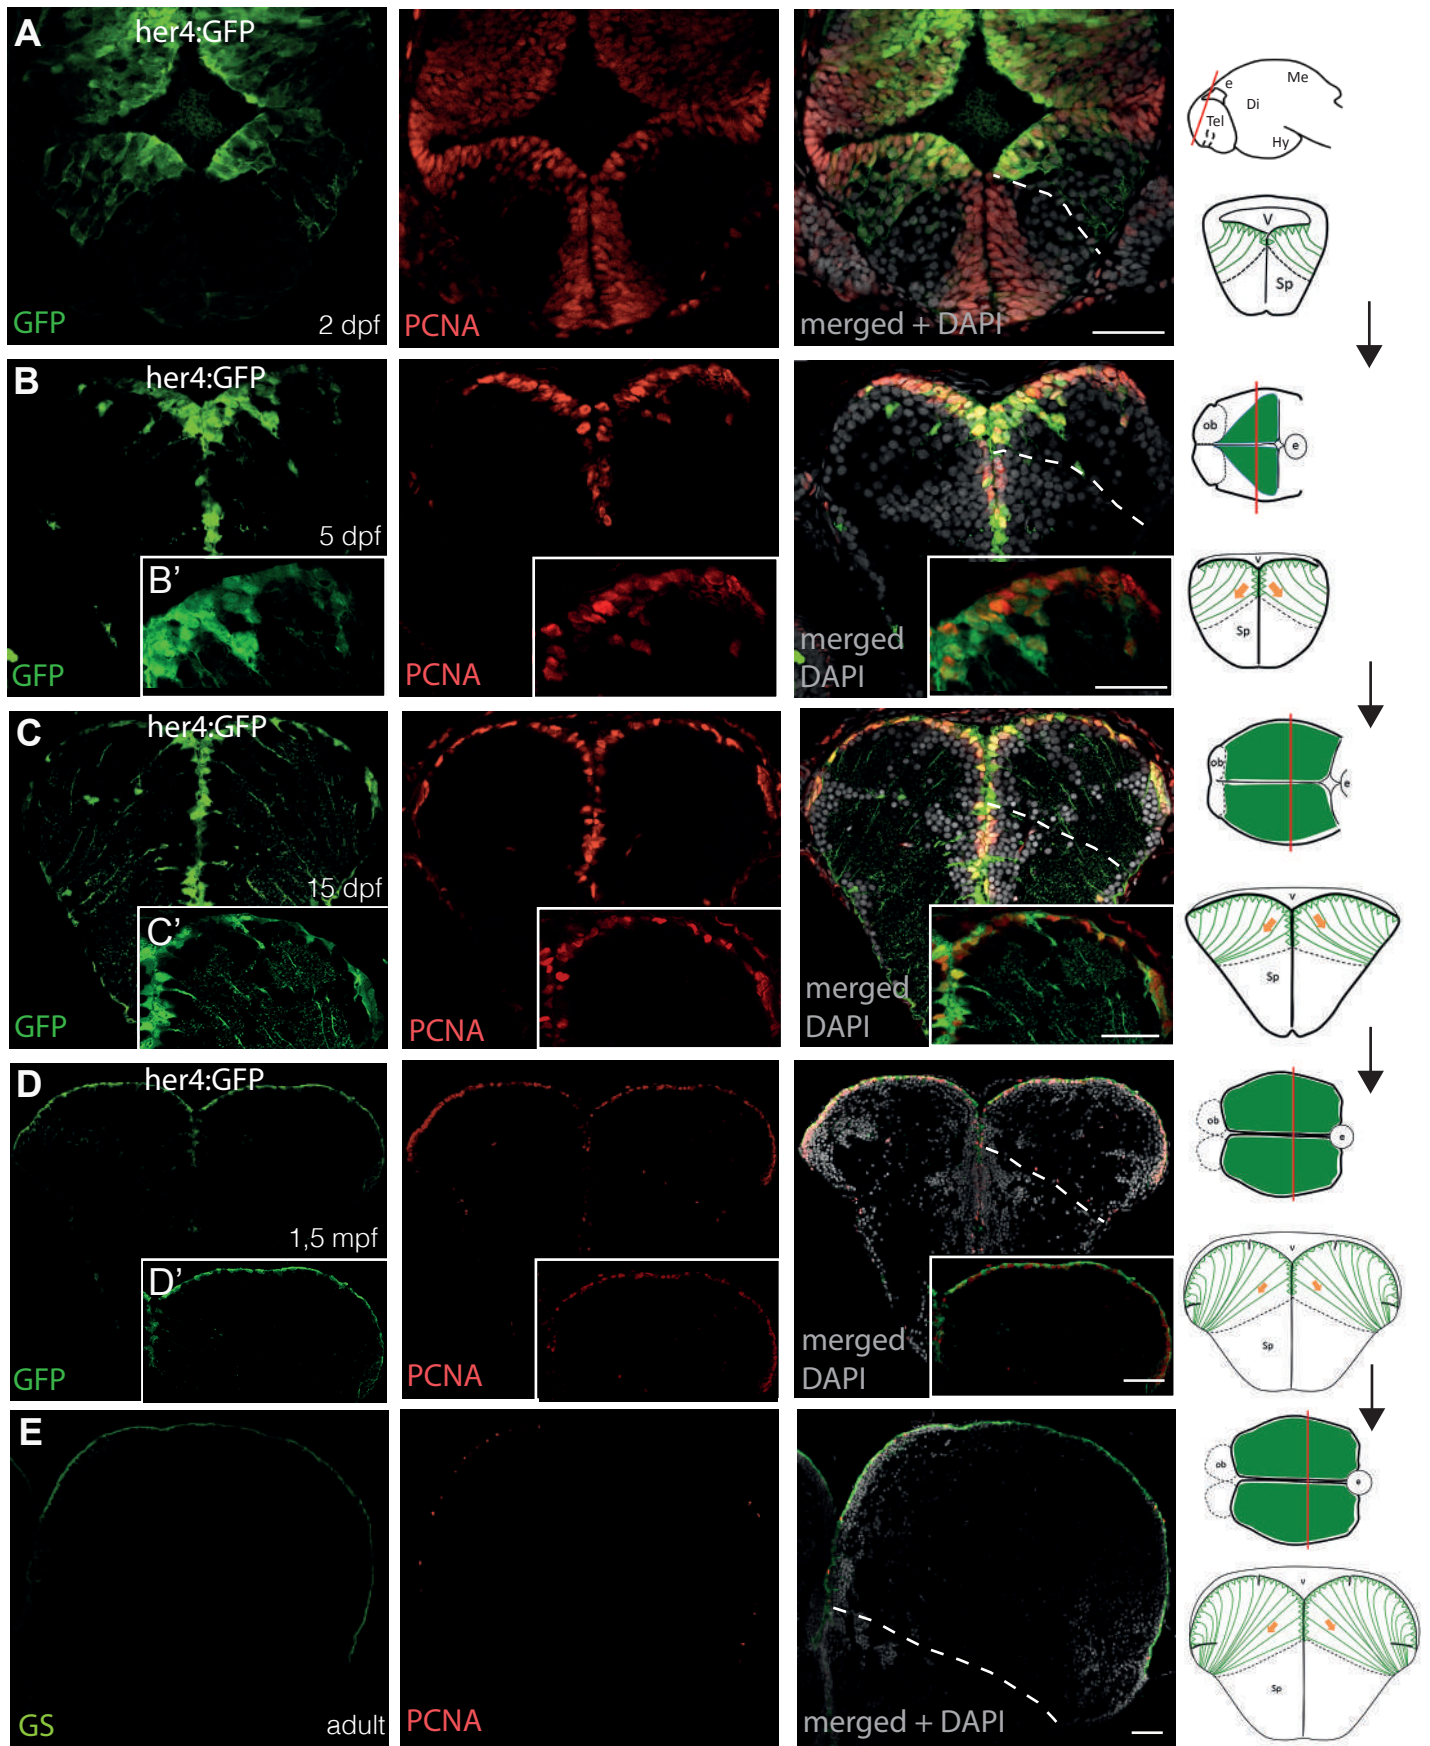

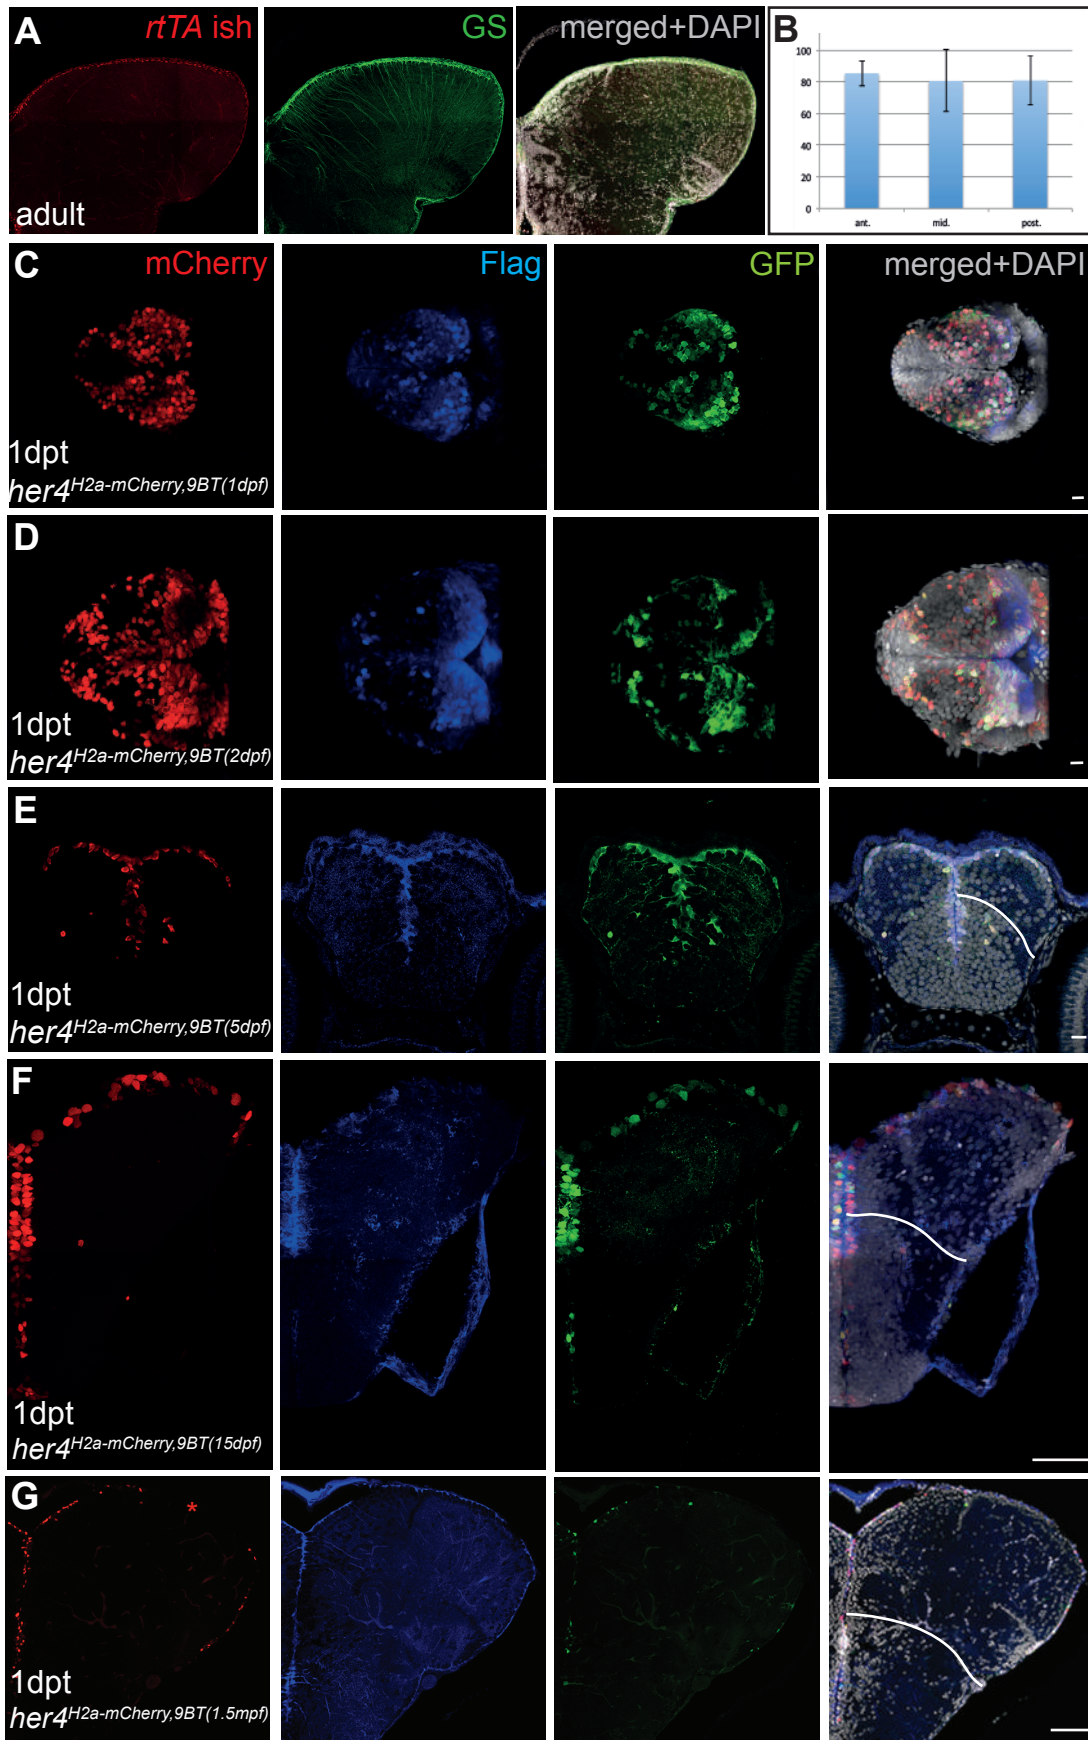

Figure S3

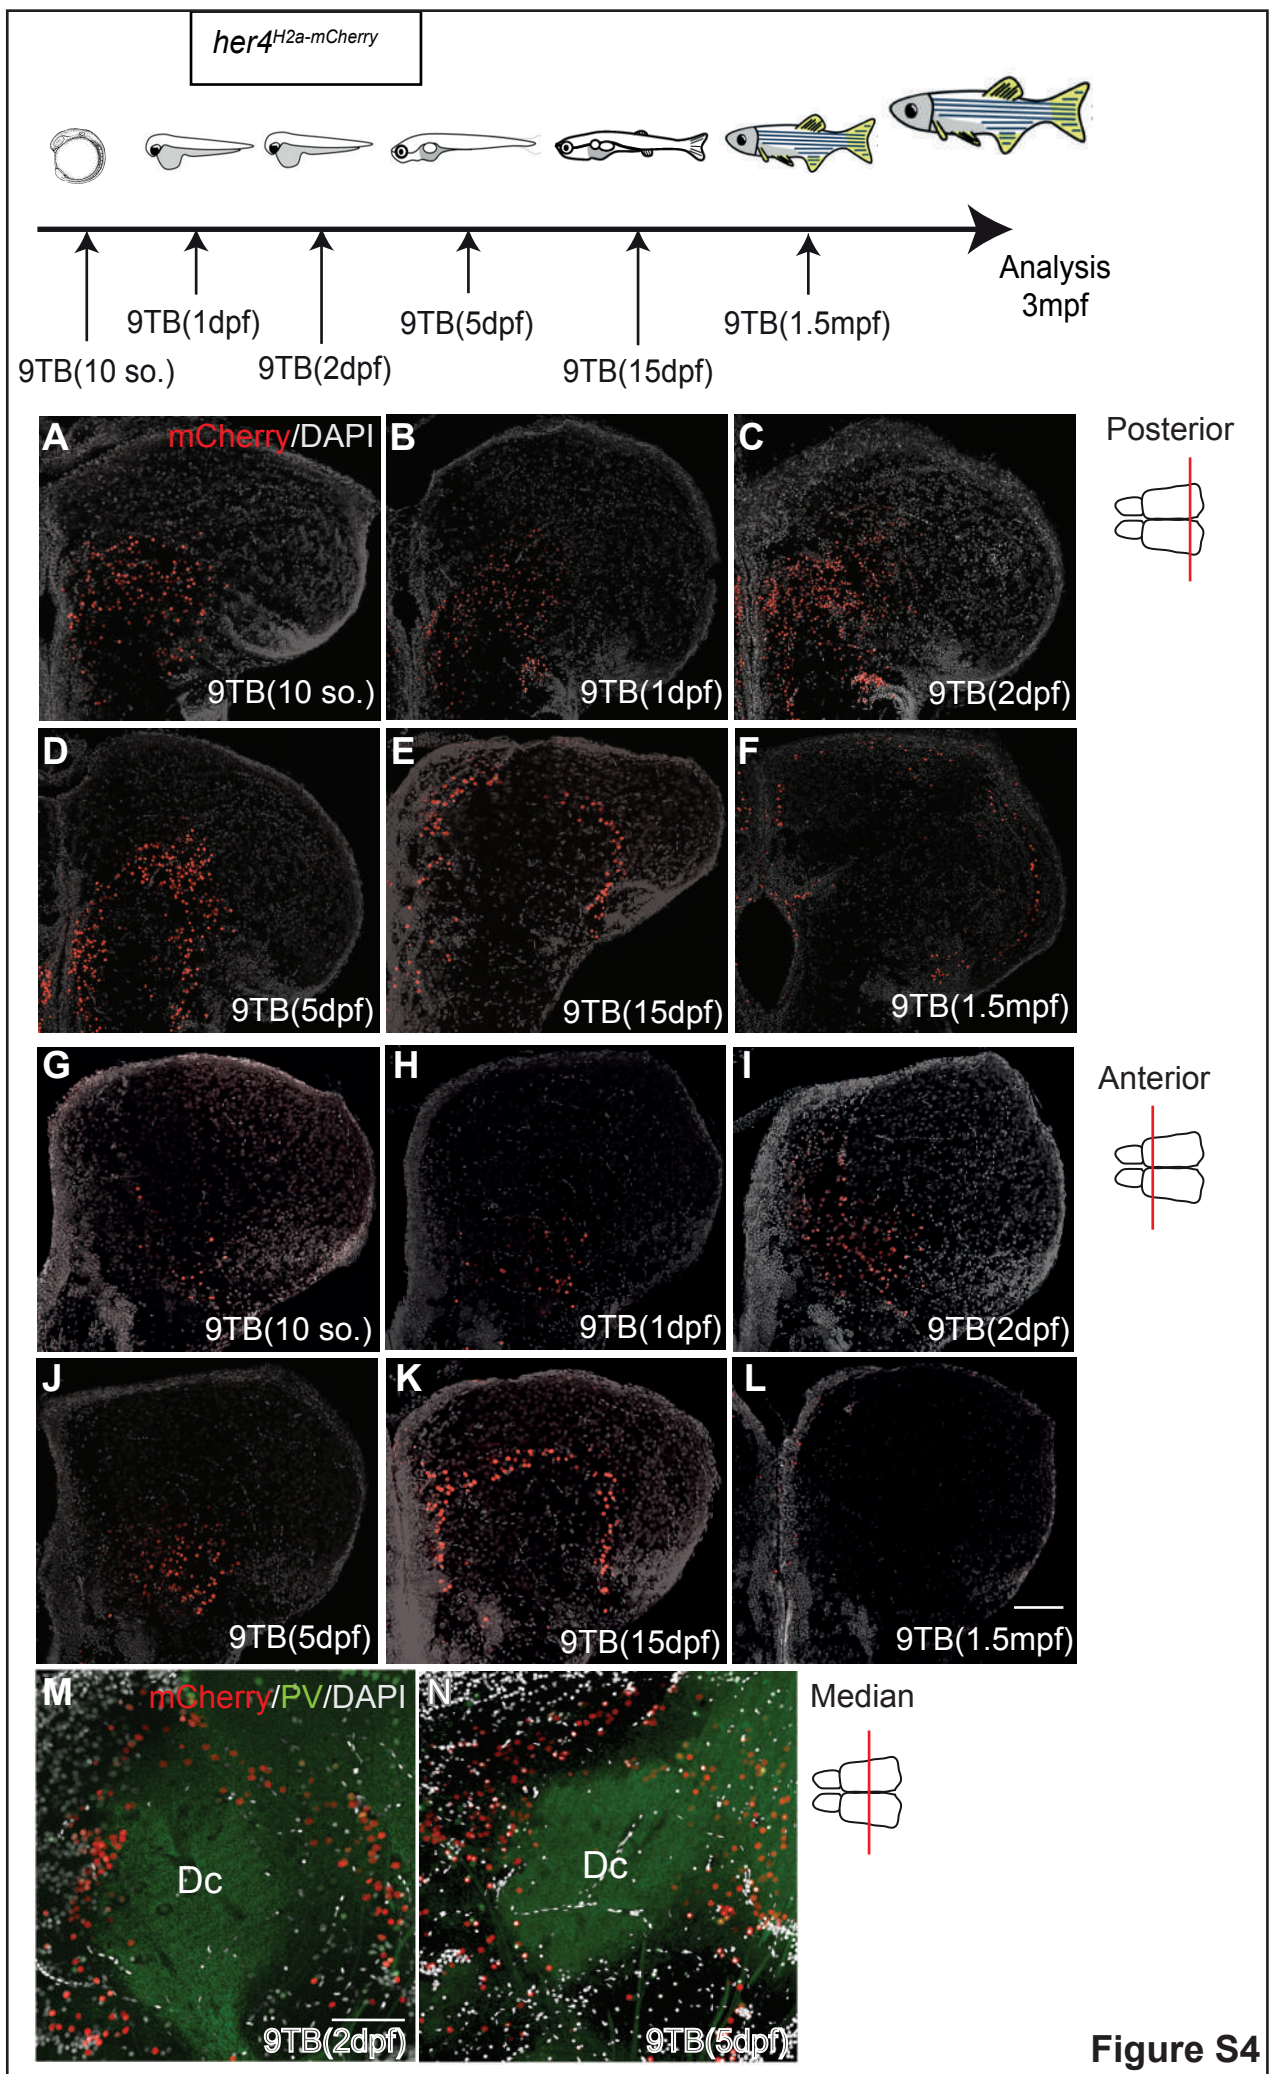

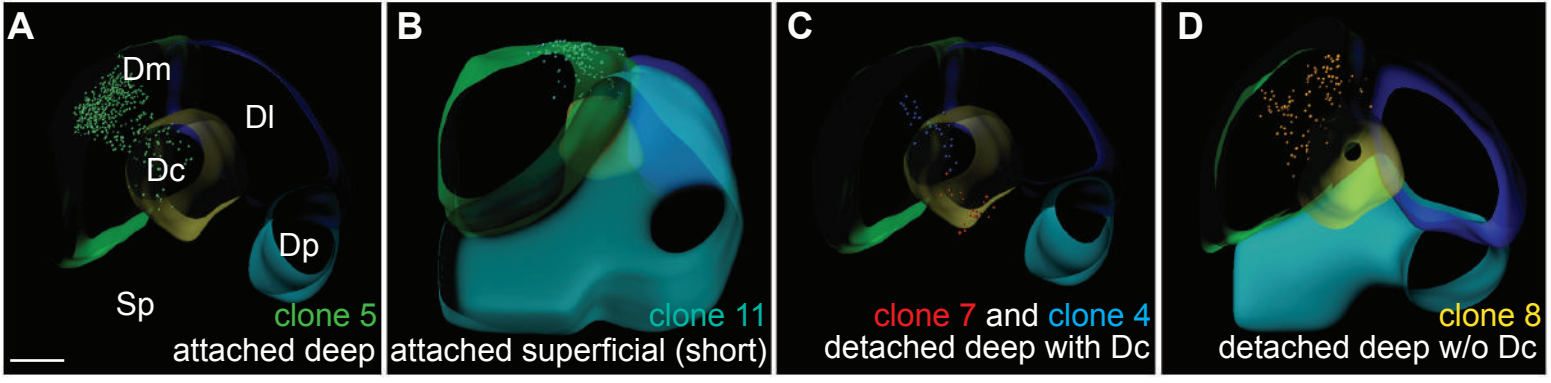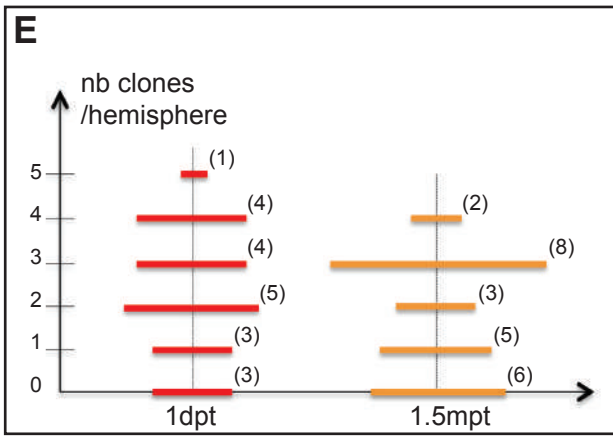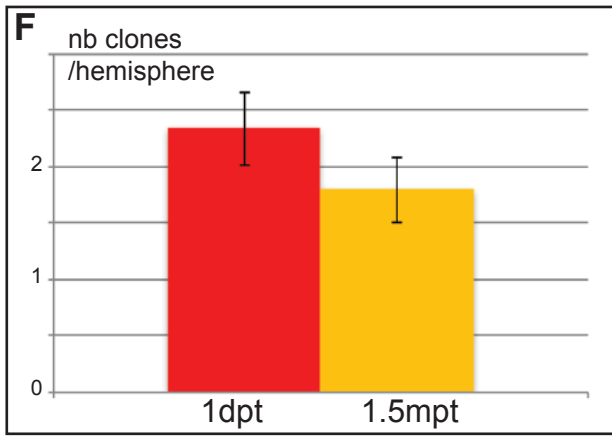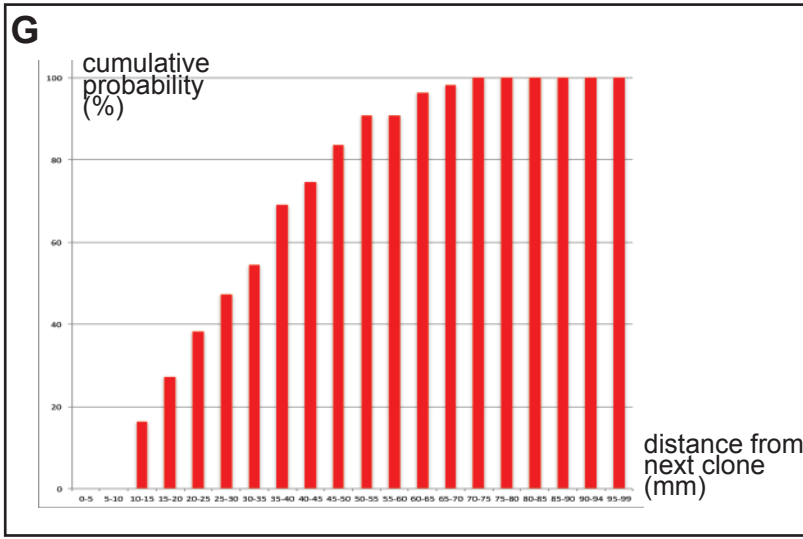

Figure S5

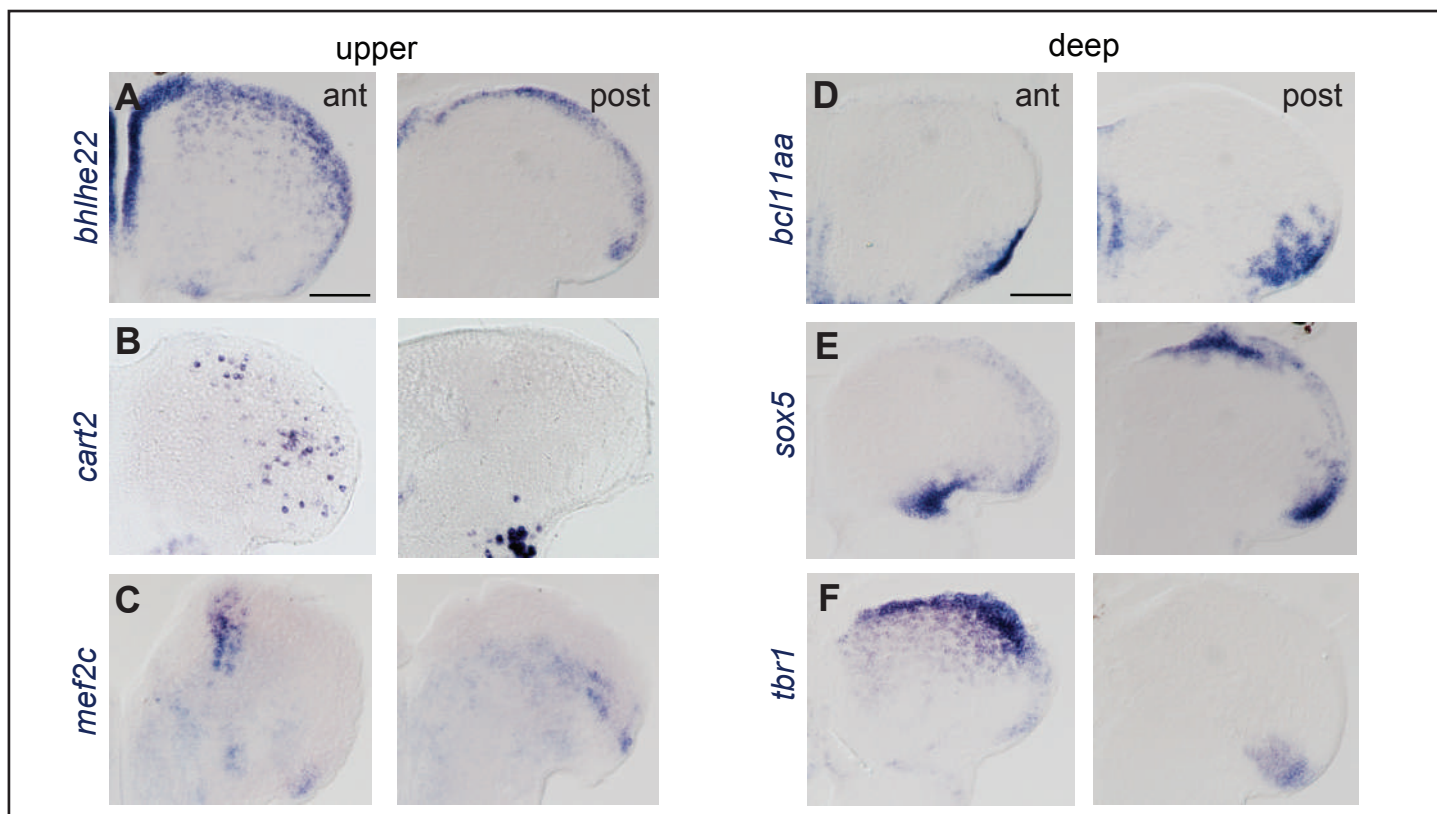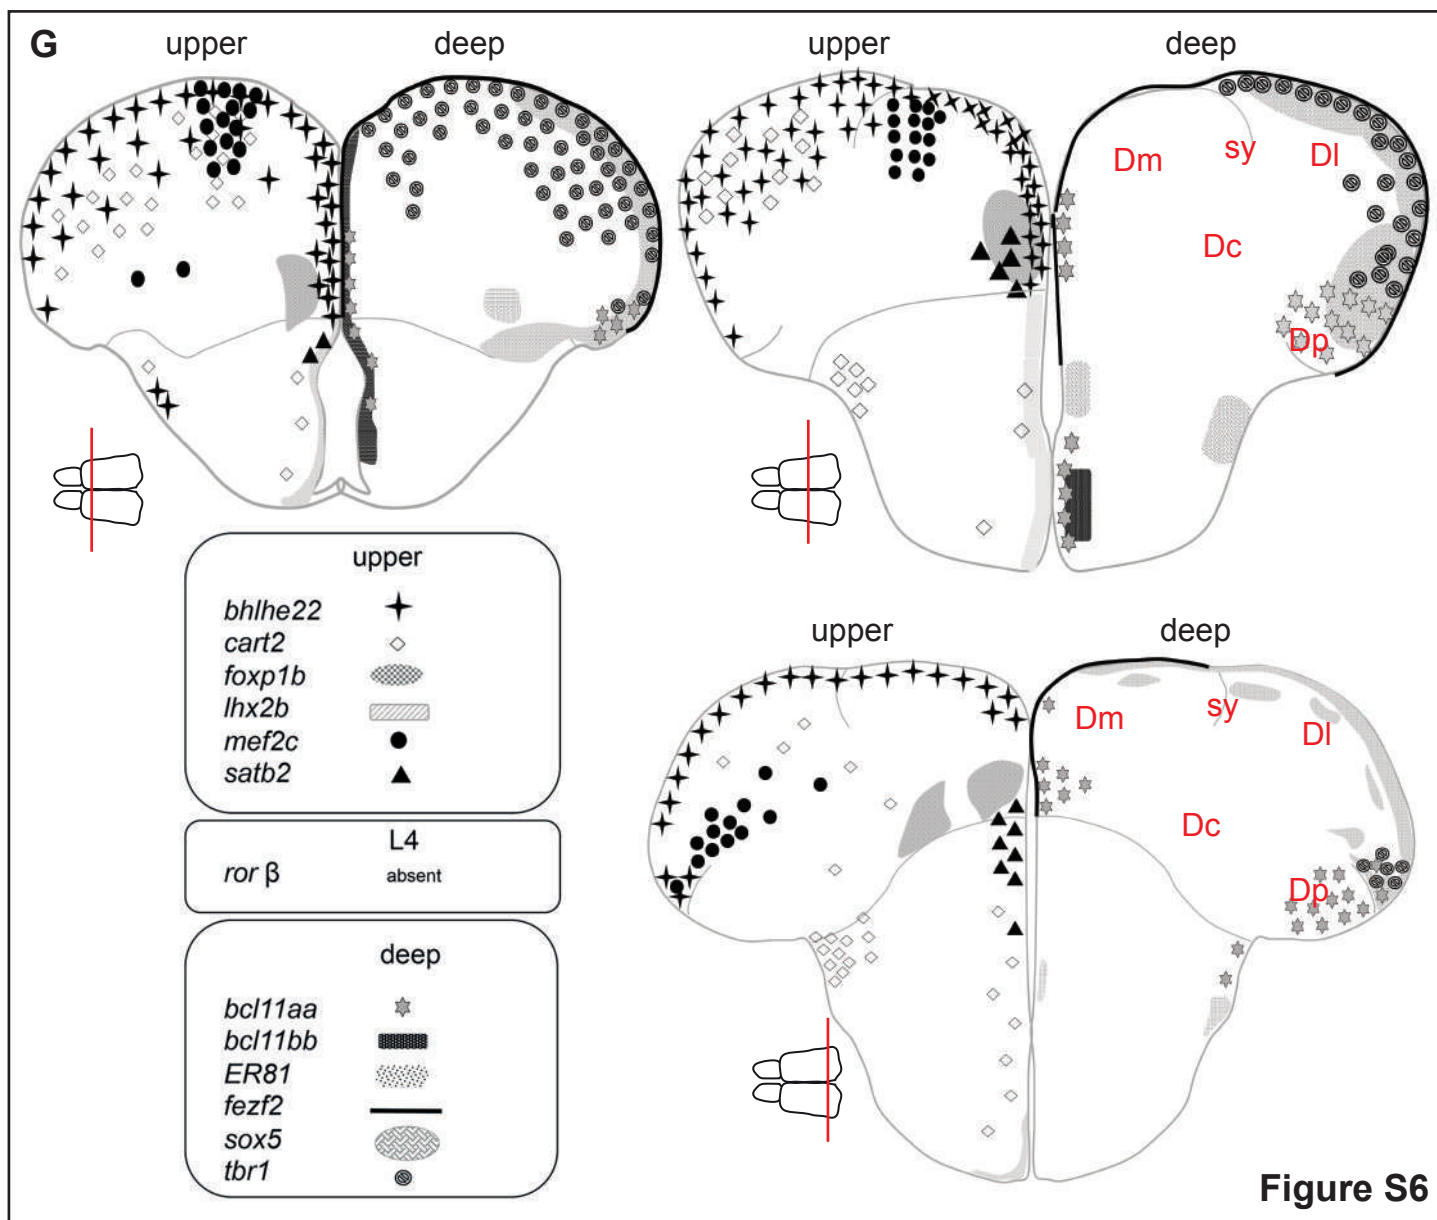

Figure S6

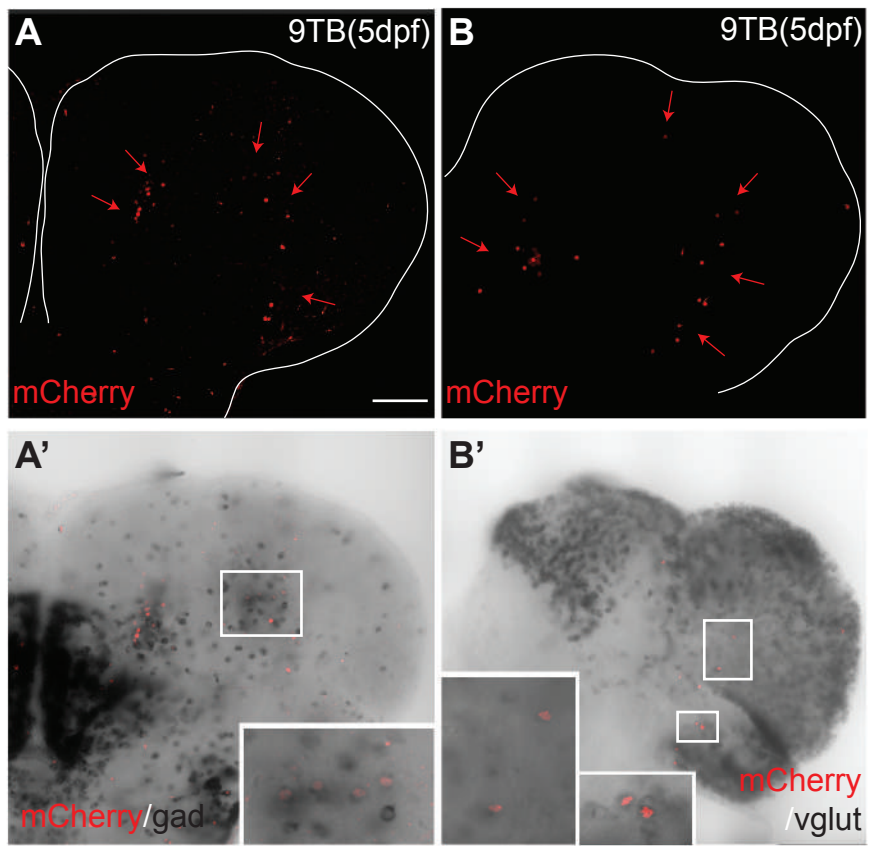

**Figure S7**



**Figure S1 : Eversion exposes the germinative RG layer in the adult zebrafish pallium,** related to Figure 1. **A.** Schematic representations of the neural stem cell (NSC)-dependent (**a, b**) and -independent (**c**) strategies shaping brain cytoarchitecture. The germinal NSC pool and its neurogenic activity are indicated in red, and neuronal identities issued from this pool are color-coded. The output structure is depicted at the top of each panel. (**a**) Continuous NSC activity generates age-related layers in the mammalian neocortex, in an inside-out fashion following radial neuronal migration. (**b, c**) Spatially controlled NSC activity and neuronal migration events organize functional nuclei in the bird and reptile neocortex (from [S4][S5]) **B.** Simplified schematized cross section of the zebrafish adult pallium at medial antero-posterior levels indicating the parenchymal subdivisions and sulci referred to in this study (from [S1]). The attachment point of the tela choroida, positioning the limit of the eversion process, is indicated (gray dots and arrows) (from [S2]). The pallial germinative zone (ventricular zone, red) extends from this point to the pallial-subpallial boundary (gray dashed line). **C.** Simplified schematized whole-mount view of the zebrafish adult pallium (viewed from top, anterior left) indicating the germinal zone areas visible from a dorsal view, as identified in [S3]. **D-G.** Whole-mount dorsal views of the pallial germinative zone in transgenic *her4:eGFP* telencephali, identified by the expression of GFP or GS (as indicated) at 2dpf (**D**), 5dpf (**E**), 1.5mpf (**F**) and 3mpf (adult, **G**). Whole-mount preparations counterstained with DAPI. Abbreviations: Da: anterior pallium; Dc: central pallium; Dl: lateral pallium domain; Dm: medial pallium domain; Dp: posterior pallium domain; ls: lateral sulcus; t.c.: tela choroida; sy: sulcus ypsiloniformis. Scale bars: D, E : 20µm; F : 50µm; G : 100µm.

**Figure S2 : Continuous and direct neurogenesis from radial glial (RG) cells in the zebrafish pallium from embryo to adulthood,** related to Fig.1. **A-E.** Cross sections of transgenic *her4:GFP* telencephali at 2dpf (**A**), 5dpf (**B**), 15dpf (**C**), 1.5mpf (**D**) and adult stage (**E**) at medial antero-posterior levels (see schemes on the right), immunostained for GFP or the RG marker Glutamine Synthase (green, left panel, as indicated), the proliferation marker PCNA (red, middle panel) and counterstained with DAPI (right panel). High magnifications in insets. White dashed line: position of the pallium/subpallium boundary. Scale bars: A, B inset, C inset : 20µm; D inset, E: 50µm. Abbreviations: Di: diencephalon; e: epiphysis; Hy: hypothalamus; Me: mesencephalon; ob: olfactory bulb; Sp: subpallium; Tel: telencephalon, V: ventricle.

**Figure S3 : Validation of the Tet-on strategy,** related to Fig.2. **A.** Compared expression of rtTA (*in situ hybridization*) and GS (immunocytochemistry) (color-coded, as indicated) on cross sections of the adult pallium in a *Tg(her4:rtTA)* fish (one hemisphere is shown, observed in

confocal microscopy). Note that *rtTA* and GS are expressed in the same set of ventricular RG. **B.** Proportion of mCherry-positive cells among ventricular cells at three different anteroposterior levels in *her4<sup>H2a-mCherry</sup>, 9TB(5dpf)* fish analyzed at 1 day-post-treatment (1dpt) (n=3 brains, T-test ( $\alpha=0.05$ , not significant). **C.** Compared expression of the three reporters mCherry, Flag and GFP (immunocytochemistry, color-coded as indicated) observed in whole-mount pallia (C, D) or pallial cross sections at mid-anteroposterior levels (E-G) in double transgenic *Tg(her4:rtTA);Tg(GFP:biTRE:H2amCHERRY)* fish induced with 9TB at 1dpf (C), 2dpf (D), 5dpf (E), 15dpf (F) and 1.5mpf (G) and sacrificed 1 day post-treatment (1dpt). Note the largely coincident expression of the three markers, the broader expression of mCherry being explained by the stability of the H2a-mCherry protein. Note also that, while *her4*-driven expression is limited to the pallial VZ until 5dpf (C-E), it extends to the subpallium at later stages (F, G). The red asterisk in panel G underlies a territory of the D1 VZ with low induction response at late stages (1.5mpf). The white line in E-G, right panels, indicates the pallial-subpallial boundary. Scale bars: C-E: 10 $\mu$ m; F, G: 50 $\mu$ m.

**Figure S4 : Zebrafish pallial neurogenesis follows a sequential stacking process : anterior and posterior analysis**, related to Fig.2. **A-L. Localization at posterior and anterior adult pallial levels of the mCherry-positive neurons born from *her4*-positive RG.** Position of mCherry-positive neurons on posterior (A-F) and anterior (G-L) 3mpf *her4<sup>H2a-mCherry</sup>* adult pallium cross sections observed in confocal microscopy (with DAPI counterstain) following 9TB induction at the stages indicated. **M, N. Localization, at median pallial levels, of the neurons born at 2 and 5dpf relative to Dc.** High magnification views of the confocal images shown in Fig.2C' and D', respectively, stained for mCherry and PV and counterstained with DAPI. Scale bars: 50 $\mu$ m.

**Figure S5 : Superimposed individual brainbow clones and neuroanatomical domains**, related to Figs.5 and 6. **A-D.** 5 clones are shown on thick cross sections of the brain shown in Fig.5A. Clone categories, as defined in Fig.5 C-G and Table S1, are indicated at the bottom right of each panel, and the clones illustrated are color-coded as in Fig.5C-I and Table S1. Note that clone n°5 and 7, shown in A and C respectively, reach into Dc. Scale bar: 80 $\mu$ m. **E-G. Validation of clonality in the analysis of *her4<sup>actswitch,T(5dpf)</sup>* larvae.** **E.** Compared distribution of the number of induced progenitors at 1 day-post-9TB (1dpt) and the number of clones at 1.5mpf (1.5 months post 9TB -mpt-). n = 20 pallial hemispheres at 1dpt and 24 pallial hemispheres at 1.5mpt. The numbers in bracket indicate the number of hemispheres concerned for each number of induced cells/clone. **F.** Average number of induced progenitors per hemisphere at 1dpt or induced clones per hemisphere at 1.5mpt (averaged from panel E). sem: 0.32 at 1dpt, 0.28 at 1.5mpt. Difference

is not significant ( $P < 0.25$ ). **G.** Cumulative distribution of the nearest neighbors distances separating labeled progenitors in the pallium of a *her4<sup>H2a-mCherry,9TB(5dpf)</sup>* animal analyzed at 1dpt (Fig.6A, A'). 84% of induced clones are located at least 15 $\mu$ m (approx. 4 cell diameters) away from their nearest neighbor clone.

**Figure S6 : Expression in the adult zebrafish pallium of genes identifying neocortical layers in mammals and/or birds: other anteroposterior levels and summary schemes**, related to Fig.7 **A-F.** Anterior (left panels) and posterior (right panels) pallial cross sections from the specimen shown in Fig.7 (*in situ hybridization* for the indicated probes, blue signal), ordered here for gene probe orthology with markers of deep (left) or upper (right) layer neurons in other vertebrates (see Table S4). **G.** Schematic summary of the expression patterns, on cross sections of the adult zebrafish pallium at anterior, median and posterior levels (equivalent to Fig.7 and panels A-F), of all the genes tested in this study (Table S4). Scale bars: 100 $\mu$ m.

**Figure S7 : Compared localization of GABA and Glutamatergic neurons with the position of neurons born at 5dpf in the adult pallium**, related to Fig.7. **A-B'**: Cross-sections at median pallial levels of *her4<sup>H2a-mCherry,9TB(5dpf)</sup>* brains observed at 3mpf (confocal microscopy, single 70 $\mu$ m stacks), immuno-processed for mCherry and stained by *in situ hybridization* with the following probes: *gad65/67a/67b* (*gad*, A') and *vglut1/2.1/2.2* (*vglut*, B'). **A, B**: fluorescence channels; **A', B'**: superimposed bright field and fluorescence channels; red arrows in A, B indicate the shape of the mCherry-positive domains and white dotted lines line the pallial contour. Insets are high magnifications of the boxed areas showing mCherry in the nucleus of *gad*- or *vglut*-positive neurons. Scale bar: 70  $\mu$ m.

| A       | B        | C          | D                    | E                    | F                          | G                | H                              | I                             | J                                | K            | L                                     | M                                       | N                                | O                       | P                     |
|---------|----------|------------|----------------------|----------------------|----------------------------|------------------|--------------------------------|-------------------------------|----------------------------------|--------------|---------------------------------------|-----------------------------------------|----------------------------------|-------------------------|-----------------------|
| Clone # | Nb cells | Nb neurons | Nb ventricular cells | Type                 | Clone length in depth (µm) | Clone width (µm) | Distance of clone from VZ (µm) | Neuroanatomical location (VZ) | Neuroanatomical location (depth) | A/P location | clone deepest z on cross section (µm) | pallium deepest z on cross section (µm) | deepest z / pallial z ratio in % | "deep" limit (table S2) | "Dc" limit (table S2) |
| 5       | 654      | 415        | 238                  | Attached/Deep        | 411                        | 238              |                                | Dm                            | Dc                               | middle       | 413                                   | 450                                     | 92                               | 39                      | 71                    |
| 6       | 646      | 568        | 78                   | Attached/Deep        | 384                        | 284              |                                | Dm                            | Dc                               | posterior    | 381                                   | 450                                     | 85                               | 76                      | 82                    |
| 9       | 29       | 22         | 7                    | Attached/Deep        | 406                        | 221              |                                | Dm                            | Dc                               | middle       | 458                                   | 554                                     | 83                               | 39                      | 71                    |
| 10      | 398      | 307        | 91                   | Attached/Deep        | 394                        | 256              |                                | Dm                            | Dc                               | posterior    | 394                                   | 450                                     | 88                               | 76                      | 82                    |
| 13      | 120      | 87         | 33                   | Attached/Deep        | 528                        | 102              |                                | Da                            | Dc                               | anterior     | 418                                   | 450                                     | 93                               | 86                      | 92                    |
| 14      | 206      | 143        | 63                   | Attached/Deep        | 324                        | 164              |                                | Dm                            | Dc                               | middle       | 445                                   | 554                                     | 80                               | 39                      | 71                    |
| 15      | 606      | 380        | 226                  | Attached/Deep        | 512                        | 255              |                                | Dm                            | Dc                               | posterior    | 393                                   | 450                                     | 87                               | 76                      | 82                    |
| 16      | 367      | 265        | 102                  | Attached/Deep        | 491                        | 105              |                                | Dm                            | Dc                               | middle       | 420                                   | 554                                     | 76                               | 39                      | 71                    |
| 18      | 560      | 487        | 73                   | Attached/Deep        | 419                        | 101              |                                | Da                            | Dc                               | anterior     | 548                                   | 583                                     | 94                               | 86                      | 92                    |
| 20      | 215      | 190        | 25                   | Attached/Deep        | 348                        | 85.5             |                                | Dm                            |                                  | middle       | 403                                   | 644                                     | 63                               | 39                      | 71                    |
| 26      | 67       | 53         | 14                   | Attached/Deep        | 404                        | 110              |                                | Dm                            |                                  | middle       | 520                                   | 805                                     | 65                               | 39                      | 71                    |
| 29      | 192      | 158        | 34                   | Attached/Deep        | 391                        | 90.7             |                                | Da                            |                                  | anterior     | 592                                   | 700                                     | 85                               | 86                      | 92                    |
| 31      | 42       | 32         | 10                   | Attached/Deep        | 409                        | 103              |                                | Dm                            |                                  | middle       | 532                                   | 805                                     | 66                               | 39                      | 71                    |
| 32      | 108      | 70         | 38                   | Attached/Deep        | 325                        | 101              |                                | Dm                            |                                  | middle       | 494                                   | 805                                     | 61                               | 39                      | 71                    |
| 33      | 118      | 90         | 28                   | Attached/Deep        | 325                        | 129              |                                | Dm                            |                                  | middle       | 503                                   | 805                                     | 62                               | 39                      | 71                    |
| 34      | 133      | 81         | 52                   | Attached/Deep        | 387                        | 97.5             |                                | Dm                            |                                  | middle       | 511                                   | 805                                     | 63                               | 39                      | 71                    |
| 2       | 162      | 109        | 53                   | Attached/Superficial | 394                        | 220 (short)      |                                | Dm                            |                                  | posterior    | 278                                   | 554                                     | 50                               | 76                      | 82                    |
| 3       | 68       | 52         | 16                   | Attached/Superficial | 291                        | 252 (short)      |                                | Dm                            |                                  | posterior    | 201                                   | 450                                     | 45                               | 76                      | 82                    |
| 11      | 137      | 72         | 65                   | Attached/Superficial | 243                        | 282 (short)      |                                | Dm                            |                                  | posterior    | 171                                   | 450                                     | 38                               | 76                      | 82                    |
| 17      | 304      | 220        | 84                   | Attached/Superficial | 214                        | 304 (flat)       |                                | Dm                            |                                  | middle       | 145                                   | 644                                     | 23                               | 39                      | 71                    |
| 21      | 404      | 269        | 135                  | Attached/Superficial | 283                        | 436 (flat)       |                                | Dm                            |                                  | middle       | 195                                   | 644                                     | 30                               | 39                      | 71                    |
| 22      | 67       | 110        | 21                   | Attached/Superficial | 374                        | 122 (short)      |                                | Da                            |                                  | anterior     | 454                                   | 583                                     | 78                               | 86                      | 92                    |
| 23      | 501      | 371        | 130                  | Attached/Superficial | 550                        | 191 (short)      |                                | Dm                            |                                  | anterior     | 550                                   | 805                                     | 68                               | 86                      | 92                    |
| 28      | 139      | 96         | 43                   | Attached/Superficial | 498                        | 127 (short)      |                                | Dm                            |                                  | posterior    | 489                                   | 805                                     | 61                               | 76                      | 82                    |
| 30      | 38       | 28         | 10                   | Attached/Superficial | 186                        | 85.4 (short)     |                                | Dm                            |                                  | middle       | 236                                   | 805                                     | 29                               | 39                      | 71                    |
| 25      | 144      | 99         | 45                   | Attached             | 230                        | 79.3 (short)     |                                | DI                            |                                  | middle       | 230                                   | 805                                     | 29                               | 39                      | 71                    |
| 27      | 247      | 187        | 60                   | Attached             | 384                        | 117              |                                | DI                            |                                  | anterior     | 489                                   | 700                                     | 70                               | 86                      | 92                    |
| 4       | 28       | 28         | 0                    | Detached/Deep        |                            |                  | 160                            | Dm                            | Dc                               | middle       | 433                                   | 450                                     | 96                               | 39                      | 71                    |
| 7       | 21       | 21         | 0                    | Detached/Deep        |                            |                  | 425                            | Dm                            | Dc                               | middle       | 545                                   | 554                                     | 98                               | 39                      | 71                    |
| 19      | 473      | 473        | 0                    | Detached/Deep        |                            |                  | 254                            | Dm                            | Dc                               | middle       | 468                                   | 644                                     | 73                               | 39                      | 71                    |
| 1       | 25       | 25         | 0                    | Detached/Deep        |                            |                  | 123                            | Dm                            |                                  | middle       | 339                                   | 554                                     | 61                               | 39                      | 71                    |
| 8       | 119      | 119        | 0                    | Detached/Deep        |                            |                  | 61                             | Dm                            |                                  | middle       | 358                                   | 554                                     | 64                               | 39                      | 71                    |
| 12      | 89       | 89         | 0                    | Detached/Deep        |                            |                  | 217                            | Dm                            |                                  | middle       | 385                                   | 554                                     | 69                               | 39                      | 71                    |
| 24      | 82       | 82         | 0                    | Detached/Deep        |                            |                  | 218                            | Dm                            |                                  | middle       | 391                                   | 805                                     | 49                               | 39                      | 71                    |

|                     |                                |      |
|---------------------|--------------------------------|------|
| Total clone nb      | 34                             |      |
| Attached   27 (80%) | Deep   16 (64%)   Including Dc | 9    |
|                     | Superficial   9 (36%)   Short  | 7    |
|                     |                                | Flat |
| Detached   7 (20%)  | ND                             | 2    |
|                     | Deep   7 (100%)   Including Dc | 3    |
|                     | Superficial                    | 0    |

Table S1

| A/P section level  | anterior                                     |                                              |                                  | middle                                            |                                                   |                                  | posterior                                    |                                              |                                  |
|--------------------|----------------------------------------------|----------------------------------------------|----------------------------------|---------------------------------------------------|---------------------------------------------------|----------------------------------|----------------------------------------------|----------------------------------------------|----------------------------------|
|                    | deepest z on cross section ( $\mu\text{m}$ ) | pallial z on cross section ( $\mu\text{m}$ ) | deepest z / pallial Z ratio in % | deepest z on cross section (b, in $\mu\text{m}$ ) | pallial z on cross section (a, in $\mu\text{m}$ ) | deepest z / pallial Z ratio in % | deepest z on cross section ( $\mu\text{m}$ ) | pallial z on cross section ( $\mu\text{m}$ ) | deepest z / pallial Z ratio in % |
| 9-TB timing        |                                              |                                              |                                  |                                                   |                                                   |                                  |                                              |                                              |                                  |
| Figure 4, Table S1 |                                              |                                              |                                  |                                                   |                                                   |                                  |                                              |                                              |                                  |
| 24hpf              | 500                                          | 510                                          | 98                               | 355                                               | 395                                               | 90                               | 380                                          | 410                                          | 93                               |
| 48hpf              | 510                                          | 550                                          | 92                               | 250                                               | 350                                               | 71                               | 329                                          | 402                                          | 82                               |
| 5dpf               | 479                                          | 559                                          | 86                               | 136                                               | 345                                               | 39                               | 301                                          | 396                                          | 76                               |
| 15dpf              | 280                                          | 507                                          | 55                               | 67                                                | 360                                               | 18                               | 244                                          | 398                                          | 61                               |
| 1.5mpf             | 20                                           | 461                                          | 4                                | 17                                                | 370                                               | 5                                | 34                                           | 410                                          | 8                                |
| "deep" limit       |                                              |                                              | 86                               |                                                   |                                                   | 39                               |                                              |                                              | 76                               |
| Dc limit           |                                              |                                              | 92                               |                                                   |                                                   | 71                               |                                              |                                              | 82                               |

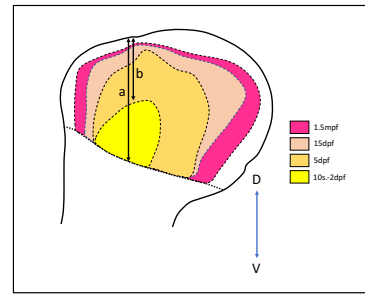

Table S2

| A       | B        | C          | D           | E                                | F                                        | G        | H                          | I                         | J                          | K                              | L                             | M            | N                                     | O                                       | P                                  |
|---------|----------|------------|-------------|----------------------------------|------------------------------------------|----------|----------------------------|---------------------------|----------------------------|--------------------------------|-------------------------------|--------------|---------------------------------------|-----------------------------------------|------------------------------------|
| Clone # | Nb cells | Nb neurons | Nb RG (GS+) | Nb proliferating RG (GS+, PCNA+) | Nb proliferating precursors (GS-, PCNA+) | Type     | Clone length in depth (µm) | Long axis of VZ area (µm) | Short axis of VZ area (µm) | Distance of clone from VZ (µm) | Neuroanatomical location (VZ) | A/P location | clone deepest z on cross section (µm) | pallium deepest z on cross section (µm) | deepest z / pallial Z ratio (in %) |
| 1       | 37       | 33         | 0           | 4                                | 0                                        | Attached | 122                        | 19                        | 10                         | 0                              | Da                            | middle       | 118                                   | 130                                     | 91                                 |
| 2       | 47       | 38         | 0           | 3                                | 6                                        | Attached | 119                        | 15                        | 1 row                      | 0                              | Da                            | anterior     | 82                                    | 130                                     | 63                                 |
| 3       | 49       | 44         | 5           | 0                                | 0                                        | Attached | 53                         | 20                        | 12                         | 0                              | DI                            | middle       | 52.5                                  | 130                                     | 40                                 |
| 5       | 56       | 53         | 3           | 0                                | 0                                        | Attached | 92                         | 21                        | 1 row                      | 0                              | Dp                            | posterior    | 46.5                                  | 130                                     | 36                                 |
| 6       | 11       | 6          | 4           | 1                                | 0                                        | Attached | 12                         | 22.1                      | 1 row                      | 0                              | Da                            | anterior     | 16.8                                  | 130                                     | 13                                 |
| 7       | 99       | 90         | 9           | 0                                | 0                                        | Attached | 66                         | 52                        | 20                         | 0                              | DI                            | posterior    | 62.4                                  | 120                                     | 52                                 |
| 8       | 176      | 148        | 28          | 0                                | 0                                        | Attached | 45                         | 57                        | 26                         | 0                              | Da                            | anterior     | 35.3                                  | 120                                     | 30                                 |
| 9       | 39       | 38         | 1           | 0                                | 0                                        | Attached | 45                         | 1 GS cell only            | NR                         | 0                              | Dm                            | middle       | 45.3                                  | 120                                     | 38                                 |
| 10      | 31       | 27         | 3           | 1                                | 0                                        | Attached | 17                         | 7                         | 1 row                      | 0                              | Dm                            | middle       | 53.6                                  | 120                                     | 45                                 |
| 11      | 48       | 42         | 6           | 0                                | 0                                        | Attached | 34                         | 31                        | 21                         | 0                              | Dm                            | middle       | 17.9                                  | 90                                      | 20                                 |
| 14      | 48       | 41         | 0           | 4                                | 3                                        | Attached | 31                         | 28                        | 12                         | 0                              | Dm                            | middle       | 33.7                                  | 112                                     | 30                                 |
| 15      | 28       | 26         | 2           | 0                                | 0                                        | Attached | 60                         | 17                        | 1 row                      | 0                              | DI                            | posterior    | 49.2                                  | 112                                     | 44                                 |
| 16      | 42       | 38         | 4           | 0                                | 0                                        | Attached | 38                         | 23                        | 4                          | 0                              | Dp                            | posterior    | 45.6                                  | 112                                     | 41                                 |
| 17      | 71       | 62         | 9           | 0                                | 0                                        | Attached | 80                         | 32                        | 17                         | 0                              | Da                            | anterior     | 69.8                                  | 112                                     | 62                                 |
| 19      | 104      | 94         | 10          | 0                                | 0                                        | Attached | 252                        | 31                        | 18                         | 0                              | Da                            | anterior     | 94.8                                  | 95.8                                    | 99                                 |
| 20      | 76       | ND         | ND          | ND                               | ND                                       | Attached | 148                        | ND                        | ND                         | 0                              | Dm                            | middle       | 61.5                                  | 95.8                                    | 64                                 |
| 21      | 176      | 142        | 34          | 0                                | 0                                        | Attached | 100                        | 82                        | 30                         | 0                              | Da                            | middle       | 76.6                                  | 95.8                                    | 80                                 |
| 22      | 201      | 160        | 7           | 6                                | 28                                       | Attached | 86                         | 22                        | 8                          | 0                              | DI                            | posterior    | 80.7                                  | 95.8                                    | 84                                 |
| 23      | 16       | ND         | ND          | ND                               | ND                                       | Attached | 41                         | ND                        | ND                         | 0                              | Dm                            | middle       | 74.9                                  | 90                                      | 83                                 |
| 24      | 99       | ND         | ND          | ND                               | ND                                       | Attached | 127                        | ND                        | ND                         | 0                              | Da                            | anterior     | 126                                   | 130                                     | 97                                 |
| 25      | 134      | ND         | ND          | ND                               | ND                                       | Attached | 97                         | ND                        | ND                         | 0                              | Dp                            | posterior    | 48.2                                  | 130                                     | 37                                 |
| 26      | 79       | 33         | 6           | 2                                | 38                                       | Attached | 133                        | 36                        | 14                         | 0                              | Dp                            | posterior    | 79                                    | 130                                     | 61                                 |
| 27      | 27       | 23         | 1           | 2                                | 1                                        | Attached | 43                         | 16                        | 1 row                      | 0                              | Dp                            | posterior    | 47                                    | 110                                     | 43                                 |
| 28      | 26       | 23         | 0           | 3                                | 0                                        | Attached | 69                         | 10                        | 1 row                      | 0                              | Dm                            | middle       | 37                                    | 110                                     | 34                                 |
| 29      | 49       | 46         | 2           | 1                                | 0                                        | Attached | 61                         | 14                        | 1 row                      | 0                              | Dp                            | posterior    | 43.8                                  | 110                                     | 40                                 |
| 30      | 41       | 31         | 1           | 2                                | 7                                        | Attached | 31                         | 16                        | 1 row                      | 0                              | Dm                            | middle       | 17.3                                  | 110                                     | 16                                 |
| 31      | 24       | 17         | 5           | 2                                | 0                                        | Attached | 31                         | 17                        | 11                         | 0                              | Dm                            | middle       | 45.1                                  | 110                                     | 41                                 |
| 32      | 37       | 36         | 1           | 0                                | 0                                        | Attached | 65                         | 1 GS cell only            | NR                         | 0                              | Dp                            | posterior    | 57.7                                  | 106                                     | 54                                 |
| 33      | 41       | 36         | 3           | 2                                | 0                                        | Attached | 42                         | 19                        | 1 row                      | 0                              | Dm                            | middle       | 22.4                                  | 106                                     | 21                                 |
| 34      | 53       | 34         | 18          | 0                                | 1                                        | Attached | 48                         | 51                        | 19                         | 0                              | Dm                            | middle       | 38.4                                  | 106                                     | 36                                 |
| 35      | 69       | ND         | ND          | ND                               | ND                                       | Attached | 113                        | ND                        | ND                         | 0                              | Dp                            | posterior    | 23.8                                  | 104                                     | 23                                 |
| 36      | 47       | 42         | 5           | 0                                | 0                                        | Attached | 88                         | 23                        | 1 row                      | 0                              | Dm                            | middle       | 25.5                                  | 70.4                                    | 36                                 |
| 37      | 38       | 35         | 3           | 0                                | 0                                        | Attached | 39                         | 15                        | 8                          | 0                              | Dm                            | middle       | 42                                    | 105                                     | 40                                 |
| 38      | 54       | 44         | 9           | 1                                | 0                                        | Attached | 33                         | 35                        | 18                         | 0                              | Dm                            | middle       | 33.6                                  | 105                                     | 32                                 |
| 39      | 23       | 11         | 12          | 0                                | 0                                        | Attached | 42                         | 25                        | 12                         | 0                              | Da                            | anterior     | 52                                    | 105                                     | 50                                 |
| 40      | 71       | 60         | 9           | 1                                | 1                                        | Attached | 86                         | 29                        | 15                         | 0                              | Da                            | anterior     | 76.6                                  | 105                                     | 73                                 |
| 4       | 33       | 33         | 0           | 0                                | 0                                        | Detached | 74                         | NR                        | NR                         | 10                             | Dm                            | middle       | 67.9                                  | 130                                     | 52                                 |
| 12      | 8        | 8          | 0           | 0                                | 0                                        | Detached | 35                         | NR                        | NR                         | 9                              | Dm                            | middle       | 26.8                                  | 90                                      | 30                                 |
| 13      | 19       | 19         | 0           | 0                                | 0                                        | Detached | 71                         | NR                        | NR                         | 22                             | DI                            | posterior    | 74.8                                  | 90                                      | 83                                 |
| 18      | 5        | 5          | 0           | 0                                | 0                                        | Detached | 75                         | NR                        | NR                         | 37                             | Dm                            | posterior    | 107                                   | 130                                     | 82                                 |

|                |          |
|----------------|----------|
| Total clone nb | 40       |
| Attached       | 36 (90%) |
| Detached       | 4 (10%)  |

Table S3

| Gene                   | Rodents                                             | Human       | Birds                                                 | Zebrafish ortholog(s)              | Adult zebrafish pallium (>2mpf)                               | refs              |
|------------------------|-----------------------------------------------------|-------------|-------------------------------------------------------|------------------------------------|---------------------------------------------------------------|-------------------|
| <i>bhlhe22(bhlhb5)</i> | L2-L5                                               |             |                                                       | <i>bhlhe22(bhlhb5)*</i>            | active / recent neurogenesis zones                            | [S7]              |
| <i>Cux2</i>            | L2-L3                                               | L2 (and L4) | mesopallium                                           | <i>cux2a*, cux2b</i>               | no expression                                                 | [S4], [S5]        |
| <i>Cart</i>            | L5                                                  | L2-3        |                                                       | <i>cart1, cart2*, cart3, cart4</i> | salt and pepper                                               | [S15]             |
| <i>FoxP1</i>           | L3-L6 in embryos, L4<br>L5 in adult                 | L3-L6       | mesopallium                                           | <i>foxp1a, foxp1b*</i>             | stripe, ventral Dm (neurons)                                  | [S4], [S8]        |
| <i>Lhx2</i>            | L3-L4                                               |             |                                                       | <i>lhx2a, lhx2b*</i>               | neurogenesis zone in ventral Dm                               | [S3]              |
| <i>Mef2c</i>           | L2 in embryos, L2-6<br>in adult                     | L2-L3-L4    | mesopallium, nidopallium                              | <i>mef2c*</i>                      | sub-domain in Dm                                              | [S4], [S5], [S13] |
| <i>Satb2</i>           | L2 in embryos, L2-6<br>in adult                     | L5          | mesopallium                                           | <i>satb2*</i>                      | almost no expression (subpallium only)                        | [S4], [S5], [S8]  |
| <i>Ror β</i>           | L4                                                  | L4          | thal. recipient (entopallium, field L)                | <i>ror β*</i>                      | no expression (midbrain only)                                 | [S4]              |
| <i>Eag2/Kcnh5</i>      | L4                                                  |             | thal. recipient, entopallium                          | <i>kcnh5a, kch5b</i>               |                                                               | [S4]              |
| <i>CTIP1*</i>          | L1 in embryos, all<br>layers at postnatal<br>stages |             |                                                       | <i>bcl11aa*</i>                    | sub-domain in D/Dp, active neurogenesis<br>zone in ventral Dm | [S10]             |
| <i>CTIP2</i>           | L5 in embryos, L4-L6<br>in adult                    | L5b         | medial domains chick pallium,<br>parahippocampal area | <i>bcl11bb*</i>                    | subpallium                                                    | [S8], [S9]        |
| <i>ER81</i>            | L5                                                  | L5          | arcopallium, parahippocampal area                     | <i>ER81*</i>                       | no expression (subpallium only)                               | [S4], [S5]        |
| <i>Fezf2</i>           | L5                                                  | L5b         | parahippocampal area                                  | <i>fezf2*</i>                      | active neurogenesis zone                                      | [S4], [S11]       |
| <i>Sox5</i>            | L5-L6                                               | L6          |                                                       | <i>sox5*</i>                       | active / recent neurogenesis zones                            | [S12]             |
| <i>Sulf2</i>           | L5                                                  |             |                                                       | <i>sulf2a,b</i>                    |                                                               | [S4]              |
| <i>Tbr1</i>            | L6                                                  | L5-L6       |                                                       | <i>tbr1*</i>                       | active / recent neurogenesis zones                            | [S14]             |

Table S4

**Table S1. Quantitative characteristics of the clones segmented in *her4<sup>Zebrafish</sup>,T(1dpf)* adult pallia.**

**Column A** : clone numbers, see Fig.5 and Fig.S5 for illustrations of the clones highlighted in color. **Columns B-D** : total number of cells per clone (B), as the sum of the number of neurons (C) and ventricular cells (D). **Column E** : clone type. “Attached” clones are defined as possessing at least one ventricular (progenitor) cell, while “detached” clones have no ventricular cells. The clones are further classified as “deep” if they contain neurons born at or before 5dpf, and as “superficial” otherwise. The z positions of the 5dpf (“deep”) and Dc (48hpf) limits (**columns O and P**) were measured on standard anterior, middle or posterior sections as in Figs.2 and S4, and normalized by pallial depth at these antero-posterior positions (Table S2). These limits are here compared to the ratio of the “z position of the deepest clone cell” to “pallial depth” for each clone (**columns L-N**) to estimate the age of the first-born neuron of each clone. Due to the curvature of the age-related neuronal sheets (eg. see Fig.2G), the age of clones situated laterally could not be ascertained and these clones are only referred to as “attached” (clones 25 and 27). **Columns F-G** : total length (distance from the most superficial to the deepest cell, F) and width (largest measure parallel to the VZ plane, G) of each clone; attached clones are referred to as “flat” if their width is superior to their length; they are referred to as “short” otherwise. **Column H** : in the case of “detached” clones, distance of the most superficial cell to the ventricular surface. **Columns I-J** : neuroanatomical location of the clone at the ventricular zone (I, Da, Dm, Dl or Dp) and in depth (J, clone overlapping – green- or not Dc). **Column K** : antero-posterior location of the clone along the pallium. “Anterior”, “middle” and “posterior” levels are those illustrated in Figs.2 and S4 and measured in Table S2. **Bottom table**: total count of the different clone categories, as defined above.

**Table S2. Quantitative positioning of neurons born at the indicated ages on anterior, middle and posterior cross sections of the pallium at 3mpf.** The position of sections is as shown in Figs.2 and S4. The diagnostic “age ratio” (deepest z/pallial at anterior, middle and posterior level) is obtained by normalizing the z position of the deepest H2a-mCherry-positive neurons (value “b” on the scheme) by the deepest z position of the pallium (value “a” on the scheme). Values in bold are those reported into Table S1.

**Table S3. Quantitative characteristics of the clones segmented in *her4<sup>actswitch</sup>,T(5dpf)* 1.5 mpf pallia.** See Fig.6 for illustrations. **Column A** : clone numbers (see Fig.6 for illustrations). **Columns B-F** : number of cells of each type within clones (number of neurons (column C), number of quiescent radial glia (GS-positive, PCNA-negative) (column D), number of activated radial glia (GS-positive, PCNA-positive) (column E) and number of proliferating non-glial precursor (GS-negative, PCNA-positive) (column F)). **Column G** : clone types (only classified as “attached” or “detached” in this



experiment). **Column H** : Clone length (length of longest axis in the parenchyme). **Columns I, J**: Size (length, width) of the VZ component (RGs, aNPs) of each clone along the ventricular plane (see Fig.6E for the schematic representation of each category –the short axis can be composed of several cell rows, one cell row, or no cells if the VZ component only consists in 1 cell-). **Column K**: depth of the clone within the parenchyme (for detached clones). **Column L** : neuroanatomical location of the clone at the ventricular zone (I, Da, Dm, Dl or Dp). **Column M** : antero-posterior location of the clone along the pallium. Columns N-P: Deepest positions of each clone and of the pallium on cross-sections, and corresponding ratios. **Bottom table** : total count of the 2 clone categories defined above. ND: not determined; NR: not relevant.

**Table S4. List of the genes identifying neocortical layers in mouse, human and chick used in this study.** The zebrafish orthologs are identified, and expression profiles in each case are reported. In case expression differs between embryonic and adult stage in rodents, this is also indicated. Zebrafish genes selected for illustrations in Figs.7 and S6 are indicated with an asterisk. After references [S5][S6][S4][S7][S8][S9][S10][S11][S12][S13][S14][S15].

### Abbreviations list

|            |                                                      |
|------------|------------------------------------------------------|
| <b>Da</b>  | anterior subdivision of the pallial ventricular zone |
| <b>Dc</b>  | central subdivision of the pallium                   |
| <b>Dl</b>  | lateral subdivision of the pallium                   |
| <b>Dm</b>  | medial subdivision of the pallium                    |
| <b>Dp</b>  | posterior subdivision of the pallium                 |
| <b>NPC</b> | neural progenitor cell                               |
| <b>NSC</b> | neural stem cell                                     |
| <b>PV</b>  | Parvalbumin                                          |
| <b>RG</b>  | radial glia                                          |
| <b>sy</b>  | sulcus ypsiloniformis                                |
| <b>VZ</b>  | ventricular zone                                     |

## References

- S1. Wullimann, M.F., Rupp, B., and Reichert, H. (1996). *Neuroanatomy of the Zebrafish Brain: A Topological Atlas*
- S2. Nieuwenhuys, R. (2011). The development and general morphology of the telencephalon of actinopterygian fishes: Synopsis, documentation and commentary. *Brain Struct. Funct.* *215*, 141–157.
- S3. Dray, N., Bedu, S., Vuillemin, N., Alunni, A., Coolen, M., Krecsmarik, M., Supatto, W., Beaurepaire, E., and Bally-Cuif, L. (2015). Large-scale live imaging of adult neural stem cells in their endogenous niche. *Development* *142*, 3592–600.
- S4. Suzuki, I.K., Kawasaki, T., Gojobori, T., and Hirata, T. (2012). The Temporal Sequence of the Mammalian Neocortical Neurogenetic Program Drives Mediolateral Pattern in the Chick Pallium. *Dev. Cell* *22*, 863–870.
- S5. Dugas-Ford, J., Rowell, J.J., and Ragsdale, C.W. (2012). Cell-type homologies and the origins of the neocortex. *Proc. Natl. Acad. Sci. U. S. A.* *109*, 16974–9.
- S6. Dugas-Ford, J., and Ragsdale, C.W. (2015). Levels of Homology and the Problem of Neocortex. *Annu. Rev. Neurosci.* *38*, 351–68.
- S7. Joshi, P.S., Molyneaux, B.J., Feng, L., Xie, X., Macklis, J.D., and Gan, L. (2008). *Bhlhb5* Regulates the Postmitotic Acquisition of Area Identities in Layers II–V of the Developing Neocortex. *Neuron* *60*, 258–272.
- S8. Cobos, I., and Seeley, W.W. (2015). Human von Economo neurons express transcription factors associated with Layer V subcerebral projection neurons. *Cereb. Cortex* *25*, 213–220.
- S9. Arlotta, P., Molyneaux, B.J., Chen, J., Inoue, J., Kominami, R., and Macklis, J.D. (2005). Neuronal subtype-specific genes that control corticospinal motor neuron development in vivo. *Neuron* *45*, 207–221.
- S10. Woodworth, M.B., Greig, L.C., Liu, K.X., Ippolito, G.C., Tucker, H.O., and Macklis, J.D. (2016). *Ctip1* Regulates the Balance between Specification of Distinct Projection Neuron Subtypes in Deep Cortical Layers. *Cell Rep.* *15*, 999–1012.
- S11. Berberoglu, M.A., Dong, Z., Mueller, T., and Guo, S. (2009). *fezf2* expression delineates cells with proliferative potential and expressing markers of neural stem cells in the adult zebrafish brain. *Gene Expr. Patterns* *9*, 411–422.
- S12. Ip, B.K., Bayatti, N., Howard, N.J., Lindsay, S., and Clowry, G.J. (2011). The corticofugal neuron-associated genes *ROBO1*, *SRGAP1*, and *CTIP2* exhibit an anterior to posterior gradient of expression in

early fetal human neocortex development. *Cereb. Cortex* 21, 1395–1407.

- S13. Leifer, D., Li, Y.L., and Wehr, K. (1997). Myocyte-specific enhancer binding factor 2C expression in fetal mouse brain development. *J Mol Neurosci* 8, 131–143.
- S14. Hevner, R.F., Shi, L., Justice, N., Hsueh, Y.P., Sheng, M., Smiga, S., Bulfone, A., Goffinet, A.M., Campagnoni, A.T., and Rubenstein, J.L.R. (2001). Tbr1 regulates differentiation of the preplate and layer 6. *Neuron* 29, 353–366.
- S15. Lein, E.S., Hawrylycz, M.J., Ao, N., Ayres, M., Bensinger, A., Bernard, A., Boe, A.F., Boguski, M.S., Brockway, K.S., Byrnes, E.J., *et al.* (2007). Genome-wide atlas of gene expression in the adult mouse brain. *Nature* 445, 168–176.
